# Supplementary material for: The Metallodrug BOLD-100 Is a Potent Inhibitor of SARS-CoV-2 Replication and Has Broad-Acting Antiviral Activity
Source: MDPI journal article supplement (doi:10.3390/biom13071095), 2023-07-08
Supplement: s1 [file s1]

## Supplementary Tables:

**Table S2: Differentially expressed genes in cells treated with BOLD-100 in the absence of SARS-CoV-2 infection with P-adjusted  $\geq 0.05$  and a fold-change  $\geq 1.5$ .**

| Rank | Gene         | $\log_{10}(\text{Fold Change})$ | $-\log_{10}(P_{\text{adjusted}})$ |
|------|--------------|---------------------------------|-----------------------------------|
| 1    | RP11-433J8.1 | 3.57                            | 1.37                              |
| 2    | ZNF439       | 3.50                            | 1.37                              |
| 3    | KIAA1755     | 3.46                            | 1.55                              |
| 4    | CABP4        | 3.39                            | 1.55                              |
| 5    | DHRS2        | 0.23                            | 1.55                              |

**Table S3: Top 30 upregulated in SARS-CoV-2 infected cells with P-adjusted  $\geq 0.05$  and a fold-change  $\geq 1.5$ .**

| Rank | Gene          | $\log_{10}(\text{Fold Change})$ | $-\log_{10}(P_{\text{adjusted}})$ |
|------|---------------|---------------------------------|-----------------------------------|
| 1    | VAC14-AS1     | 5.2                             | 3.82                              |
| 2    | ZNF334        | 5.07                            | 2.37                              |
| 3    | RP11-998D10.5 | 5.04                            | 2.34                              |
| 4    | FUT6          | 5.01                            | 3.69                              |
| 5    | KLRK1         | 4.98                            | 3.58                              |
| 6    | LHFPL3-AS1    | 4.97                            | 3.72                              |
| 7    | IRGM          | 4.96                            | 2.23                              |
| 8    | FCAMR         | 4.95                            | 3.5                               |
| 9    | C1orf141      | 4.93                            | 2.26                              |
| 10   | AP001331.1    | 4.93                            | 3.45                              |
| 11   | GOLGA6B       | 4.92                            | 3.4                               |
| 12   | PPP1R1B       | 4.92                            | 3.54                              |
| 13   | KIAA1755      | 4.91                            | 5.9                               |
| 14   | GPR111        | 4.89                            | 3.2                               |
| 15   | CABP4         | 4.89                            | 6.02                              |
| 16   | SLC30A8       | 4.88                            | 2.21                              |
| 17   | RP11-353N4.5  | 4.85                            | 1.83                              |

|    |                |      |      |
|----|----------------|------|------|
| 18 | RP11-328C8.4   | 4.85 | 2.4  |
| 19 | RP11-467L20.10 | 4.85 | 3.08 |
| 20 | RP11-863K10.2  | 4.8  | 2.18 |
| 21 | RP11-433J8.1   | 4.8  | 5.59 |
| 22 | PIGR           | 4.79 | 2.77 |
| 23 | ZG16B          | 4.78 | 2.12 |
| 24 | HSH2D          | 4.78 | 3.35 |
| 25 | KLRC1          | 4.75 | 2.96 |
| 26 | PYY            | 4.73 | 2.09 |
| 27 | AC139100.3     | 4.71 | 2.96 |
| 28 | TNFSF11        | 4.71 | 3.1  |
| 29 | RP11-750H9.5   | 4.7  | 1.63 |
| 30 | GPR26          | 4.7  | 2.06 |

**Table S4: Top 30 downregulated in SARS-CoV-2 infected cells with P-adjusted  $\geq 0.05$  and a fold-change  $\geq 1.5$ .**

| Rank | Gene          | $\log_{10}(\text{Fold Change})$ | $-\log_{10}(P_{\text{adjusted}})$ |
|------|---------------|---------------------------------|-----------------------------------|
| 1    | RN7SL5P       | -5.89                           | 8.37                              |
| 2    | PDF           | -4.92                           | 8.52                              |
| 3    | GS1-184P14.2  | -4.8                            | 4.28                              |
| 4    | RPS26P8       | -4.72                           | 7.89                              |
| 5    | HBQ1          | -4.63                           | 7.26                              |
| 6    | RP11-349N19.2 | -4.61                           | 6.46                              |
| 7    | RPS26P31      | -4.61                           | 3.21                              |
| 8    | PRDX2P4       | -4.59                           | 7.19                              |
| 9    | H3F3BP1       | -4.59                           | 6.84                              |
| 10   | RP11-680G24.4 | -4.5                            | 6.65                              |
| 11   | RP13-444K19.1 | -4.47                           | 7.23                              |
| 12   | MTX1P1        | -4.46                           | 6.4                               |
| 13   | IDSP1         | -4.44                           | 6.76                              |
| 14   | EEF1A1P4      | -4.44                           | 6.45                              |
| 15   | COX11P1       | -4.42                           | 6.56                              |
| 16   | LMO3          | -4.41                           | 6.56                              |
| 17   | SPINK2        | -4.41                           | 6.48                              |

|    |               |       |      |
|----|---------------|-------|------|
| 18 | FTH1P20       | -4.4  | 6.62 |
| 19 | VWA5A         | -4.37 | 6.64 |
| 20 | AC005884.1    | -4.37 | 6.55 |
| 21 | SLC25A5P2     | -4.34 | 6.58 |
| 22 | HSPB1P1       | -4.34 | 6.38 |
| 23 | RP11-475I24.1 | -4.34 | 6.38 |
| 24 | CTA-963H5.5   | -4.34 | 5.88 |
| 25 | ATP5G1P4      | -4.33 | 6.66 |
| 26 | PTGES         | -4.32 | 6.67 |
| 27 | MAOB          | -4.32 | 6.48 |
| 28 | CLPSL2        | -4.32 | 6.1  |
| 29 | CACNG5        | -4.31 | 6.2  |
| 30 | TMSB4XP8      | -4.29 | 6.32 |

**Table S5: Top 30 upregulated in SARS-CoV-2 infected cells treated with BOLD-100 with P-adjusted  $\geq 0.05$  and a fold-change  $\geq 1.5$ .**

| Rank | Gene          | $\log_{10}(\text{Fold Change})$ | $-\log_{10}(P_{\text{adjusted}})$ |
|------|---------------|---------------------------------|-----------------------------------|
| 1    | GOLGA6B       | 3.93                            | 1.47                              |
| 2    | LHFPL3-AS1    | 3.88                            | 1.64                              |
| 3    | FUT6          | 3.87                            | 1.56                              |
| 4    | KLRK1         | 3.84                            | 1.54                              |
| 5    | KIAA1755      | 3.81                            | 2.63                              |
| 6    | ZNF439        | 3.79                            | 2.51                              |
| 7    | RP11-433J8.1  | 3.79                            | 2.51                              |
| 8    | IFNA22P       | 3.77                            | 1.35                              |
| 9    | PPP1R1B       | 3.76                            | 1.53                              |
| 10   | FCAMR         | 3.76                            | 1.49                              |
| 11   | GPR111        | 3.72                            | 1.34                              |
| 12   | VAC14-AS1     | 3.71                            | 1.53                              |
| 13   | CABP4         | 3.70                            | 2.63                              |
| 14   | WEE2          | 3.66                            | 1.42                              |
| 15   | RP11-498C9.16 | 3.65                            | 1.38                              |
| 16   | AP001331.1    | 3.58                            | 1.37                              |
| 17   | LTA           | 1.40                            | 1.54                              |

|    |               |      |      |
|----|---------------|------|------|
| 18 | FAM230A       | 1.39 | 1.39 |
| 19 | RP11-1220K2.2 | 1.28 | 3.76 |
| 20 | FAM71F1       | 1.16 | 1.31 |
| 21 | GGTLC3        | 1.16 | 1.36 |
| 22 | RP11-196G18.3 | 1.06 | 1.91 |
| 23 | MGAM          | 1.05 | 3.76 |
| 24 | KIAA1683      | 0.92 | 2.52 |
| 25 | CASS4         | 0.91 | 2.31 |
| 26 | CD200R1       | 0.89 | 1.82 |
| 27 | ZNF658B       | 0.86 | 1.52 |
| 28 | MOBP          | 0.79 | 1.51 |
| 29 | TG            | 0.75 | 1.61 |
| 30 | ANKRD26P1     | 0.70 | 2.09 |

**Table S6: Top 30 downregulated in SARS-CoV-2 infected cells treated with BOLD-100 with P-adjusted  $\geq 0.05$  and a fold-change  $\geq 1.5$ .**

| Rank | Gene          | $\log_{10}(\text{Fold Change})$ | $-\log_{10}(P_{\text{adjusted}})$ |
|------|---------------|---------------------------------|-----------------------------------|
| 1    | GS1-184P14.2  | -4.74                           | 2.31                              |
| 2    | RP11-426L16.9 | -3.41                           | 2.20                              |
| 3    | RPL41P1       | -0.38                           | 1.94                              |
| 4    | RAB1C         | -0.37                           | 1.64                              |
| 5    | GRM4          | -0.36                           | 1.48                              |
| 6    | RPS15AP24     | -0.35                           | 1.48                              |
| 7    | AC074212.5    | -0.34                           | 1.57                              |
| 8    | CTD-2287O16.5 | -0.33                           | 1.55                              |
| 9    | LUC7L2        | -0.32                           | 1.34                              |
| 10   | SNRFP1        | -0.30                           | 1.74                              |
| 11   | PPP1R1A       | -0.29                           | 1.91                              |
| 12   | MT-ATP6       | -0.27                           | 1.56                              |
| 13   | SPOCK1        | -0.27                           | 1.34                              |
| 14   | MT-CO2        | -0.27                           | 1.73                              |
| 15   | MT-ND4        | -0.26                           | 1.56                              |
| 16   | PTP4A3        | -0.26                           | 1.38                              |
| 17   | MT-ND5        | -0.26                           | 1.82                              |
| 18   | HMG1P38       | -0.25                           | 1.50                              |

|    |               |       |      |
|----|---------------|-------|------|
| 19 | MT-ND4L       | -0.25 | 1.82 |
| 20 | RP13-516M14.1 | -0.25 | 1.53 |
| 21 | TENM4         | -0.23 | 2.09 |
| 22 | YBX1P10       | -0.23 | 1.56 |
| 23 | MT-ND1        | -0.23 | 1.42 |
| 24 | IGFBP5        | -0.23 | 1.91 |
| 25 | ADRA2C        | -0.23 | 1.52 |
| 26 | ACTA2         | -0.22 | 1.69 |
| 27 | MT-CO3        | -0.22 | 1.67 |
| 28 | YBX1P1        | -0.22 | 2.08 |
| 29 | HMG2P5        | -0.22 | 1.54 |
| 30 | ATP1B2        | -0.21 | 1.95 |
